# Supplementary material
Source: publisher figshare collection journal article supplement (https://acs.figshare.com/ndownloader/files/3750697)
Supplement: Supplementary file 1 [file 3750697]

1    **SUPPORTING INFORMATION**

2    The Effect of Surface Hydrophobicity on the Function of the Immobilized

3    Biomineralization Protein Mms6

4    Xunpei Liu,<sup>a,b,+</sup> Honghu Zhang,<sup>a,c,+</sup> Srikanth Nayak,<sup>a,b</sup> German Parada<sup>b</sup>, James Anderegg<sup>a</sup>, Shuren  
5    Feng<sup>a,d</sup>, Marit Nilsen-Hamilton<sup>a,d</sup>, Mufit Akinc<sup>a,c</sup> and Surya Mallapragada<sup>a,b,\*</sup>

6

7    <sup>a</sup>Division of Materials Science and Engineering, Ames Laboratory, Ames, IA 50011, USA

8    <sup>b</sup>Department of Chemical & Biological Engineering, Iowa State University, Ames, Iowa 50011,  
9    USA

10    <sup>c</sup>Department of Materials Science & Engineering, Iowa State University, Ames, Iowa 50011,  
11    USA

12    <sup>d</sup>Roy J. Carver Department of Biochemistry, Biophysics and Molecular Biology, Iowa State  
13    University, Ames, Iowa 50011, USA

14    + Joint first authors

15    \*Corresponding author: [suryakm@iastate.edu](mailto:suryakm@iastate.edu)

16

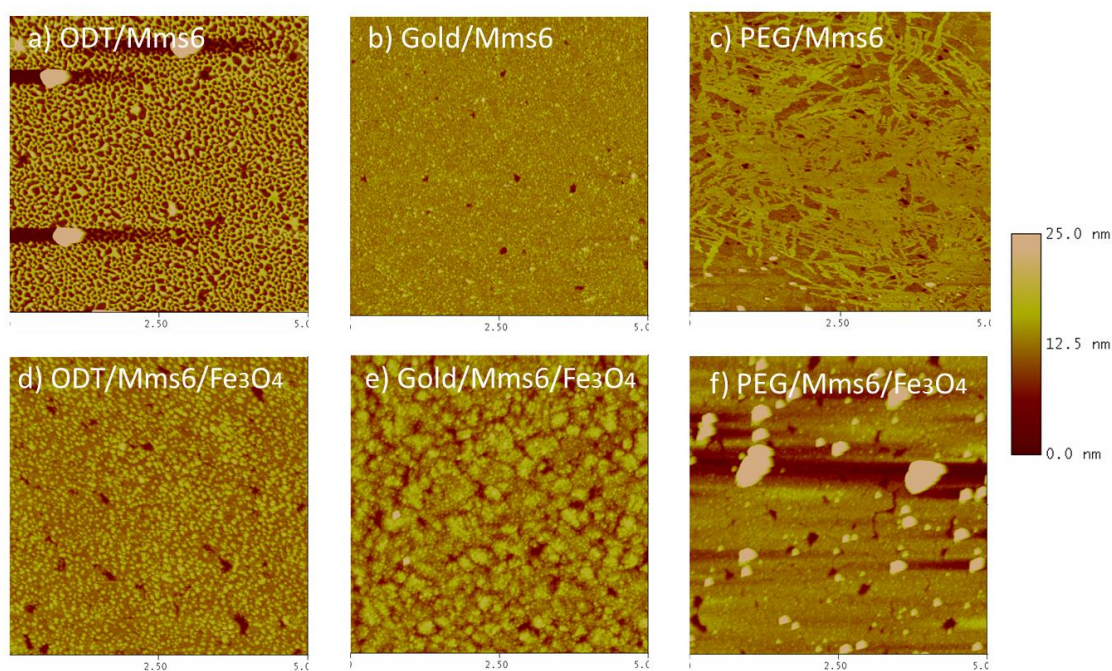

1

2 **Figure S1.** AFM scan of surfaces with Mms6 prior to magnetite nanoparticle synthesis: a) Mms6  
 3 coated ODT, b) Mms6 coated gold and c) Mms6 coated PEG surfaces; and after synthesis of  
 4 magnetite nanoparticles: d) magnetite grown on Mms6-ODT surface, e) magnetite grown on  
 5 Mms6-gold surface, and f) magnetite grown on Mms6-PEG surface. Scan area 5 μm × 5 μm.  
 6 Mms6 shows different aggregation on the surfaces with different hydrophobicities.

7

8

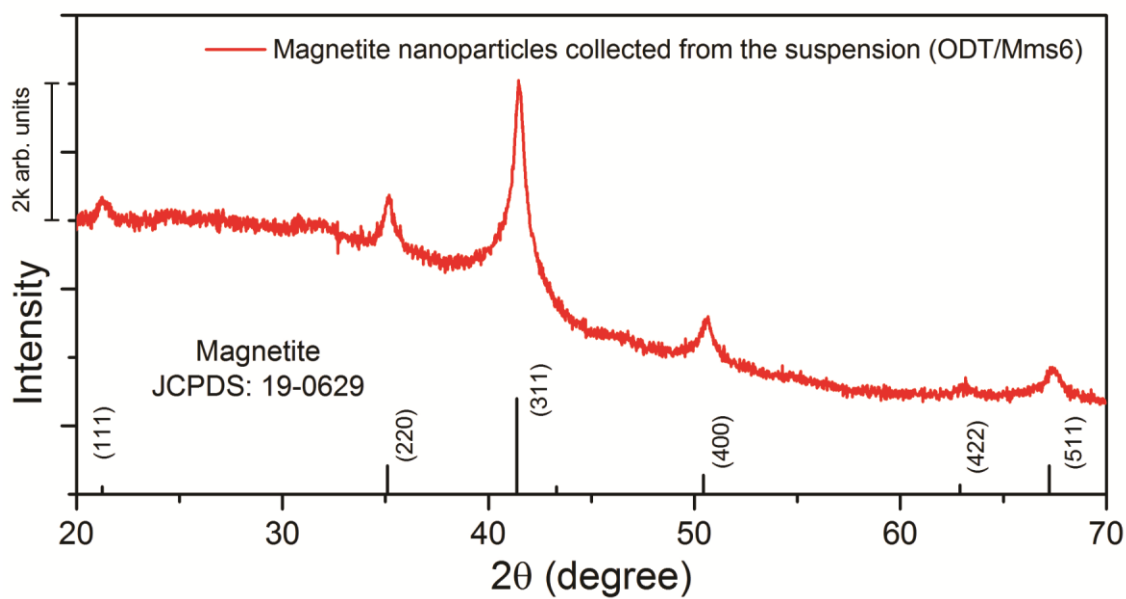

1

2 **Figure S2.** XRD pattern for the black precipitates collected from suspension in the Mms6-ODT  
3 surface sample.

4

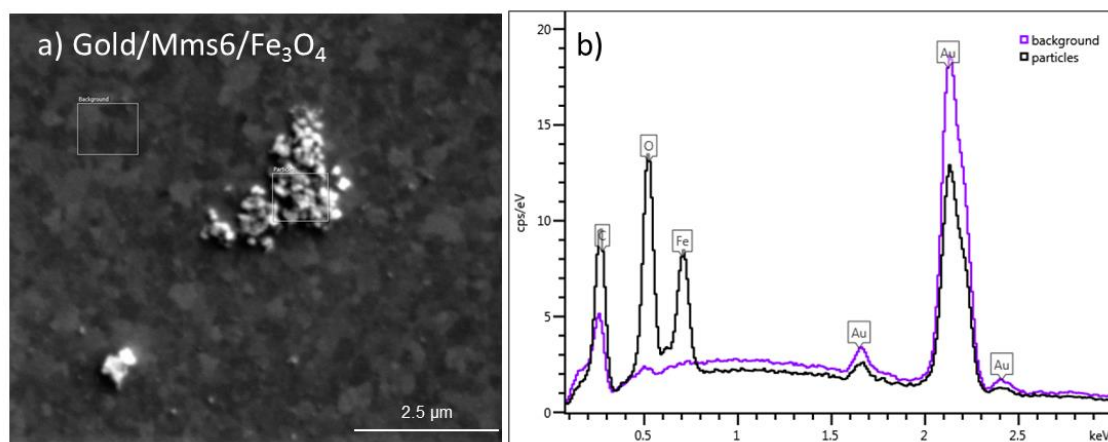

1

2 **Figure S3.** SEM image (a) and EDS analysis (b) of magnetite grown on Mms6 coated gold  
3 surface without ODT coating.

1

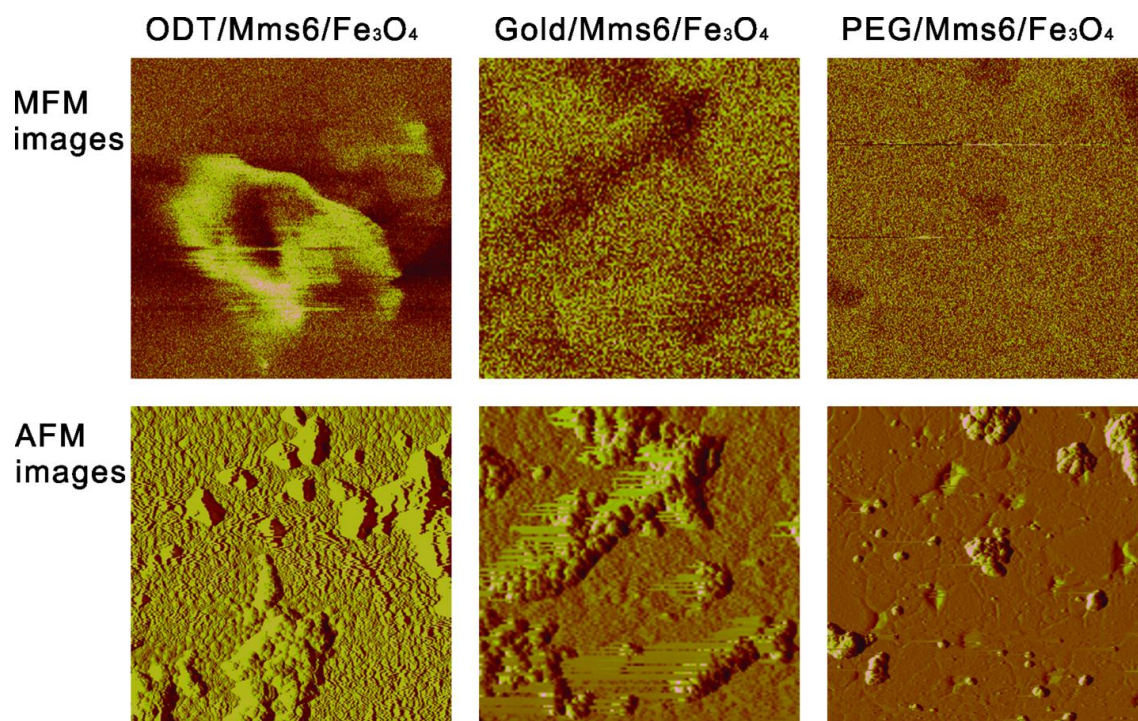

2

3 **Figure S4.** AFM and MFM scans in the same area of surfaces with magnetite nanoparticles  
4 grown on Mms6 coated surfaces: ODT, gold and PEG surfaces. Scan area 3  $\mu\text{m}$   $\times$  3  $\mu\text{m}$ .

5

6
